# Supplementary material for: Mesoscale Characterization of Supramolecular Transient Networks Using SAXS and Rheology
Source: Int J Mol Sci. 2014 Jan 16;15(1):1096–111. doi: 10.3390/ijms15011096 (PMC3907858; doi:10.3390/ijms15011096)

## Supplementary Information

**Figure S1.** Confocal microscopy image of a viscoelastic solution of **1a** at a concentration of 5 wt% under neutral conditions. The scale bar corresponds to 50  $\mu\text{m}$ .

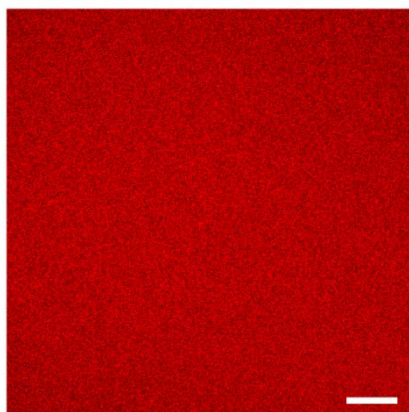

**Figure S2.** Small-angle X-ray scattering profiles of **1b** at (a) 5 wt %, (b) 15 wt % and (c) 20 wt % at 70  $^{\circ}\text{C}$  (black) and 2 days (red), 8 h (green) and 30 min (blue) after cooling back to room temperature.

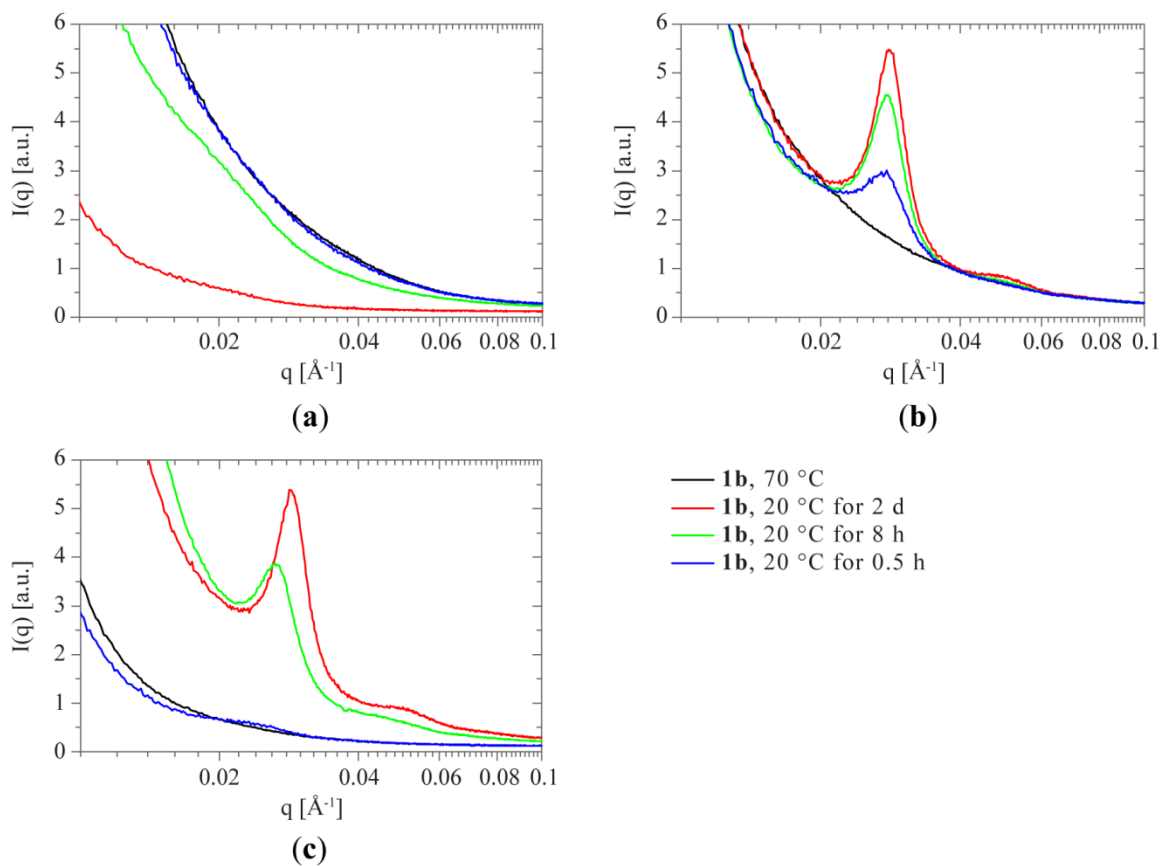

**Figure S3.** Small angle X-ray scattering profiles for **1b** at (a) 5 wt %, (b) 15 wt % and (c) 20 wt % under neutral (black), basic (red) and neutralized (green) conditions.

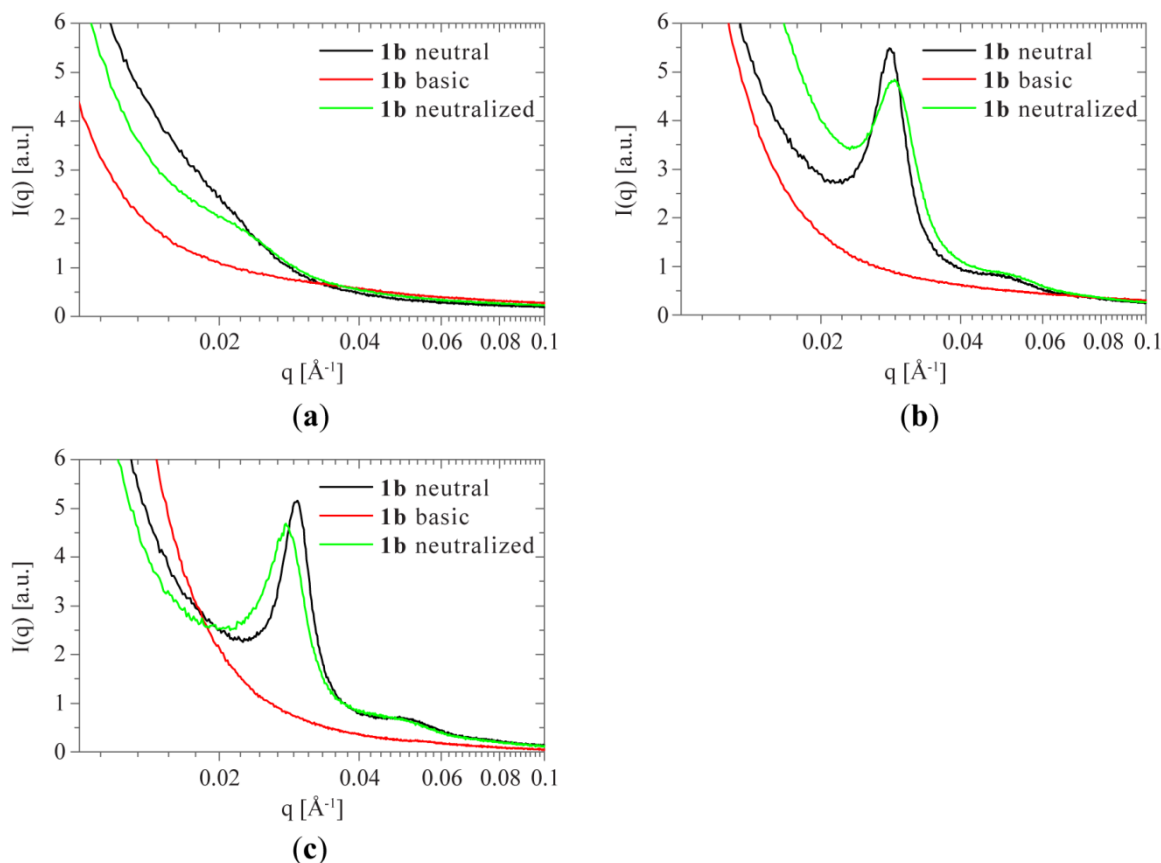

Supplement: Supplementary file 1 [file ijms-15-01096-s001.pdf]
